# Supplementary material
Source: PubMed Central journal article supplement (PMC2692799)
Supplement: 90369.2008_1.pdf [file 90369.2008_1.pdf]

**Supplemental Table 3. The commonly up-regulated genes in lungs of A/J mice exposed to CS for different time periods.**

| Genbank ID | Gene Title                                                                         | Gene Symbol       | 5 h<br>FC $\pm$ SEM | 8 d<br>FC $\pm$ SEM | 1.5 mos<br>FC $\pm$<br>SEM | 6 mos<br>FC $\pm$ SEM |
|------------|------------------------------------------------------------------------------------|-------------------|---------------------|---------------------|----------------------------|-----------------------|
| AA419994   | Zinc finger and btb domain containing 16*                                          | Zbtb16            | 3.4 $\pm$ 0.5       | 7.1 $\pm$ 0.4       | 4.8 $\pm$ 0.4              | 2.4 $\pm$ 0.4         |
| AV124537   | Extra cellular link domain-containing 1*                                           | Xlkd1             | 3.0 $\pm$ 0.4       | 2.1 $\pm$ 0.4       | 2.6 $\pm$ 0.4              | 2.9 $\pm$ 0.4         |
| AW108044   | Uncoupling protein 2 (mitochondrial, proton carrier)*                              | Ucp2              | 1.6 $\pm$ 0.4       | 2.0 $\pm$ 0.4       | 1.5 $\pm$ 0.4              | 1.5 $\pm$ 0.4         |
| BB284199   | Thioredoxin reductase 1*                                                           | Txnrd1            | 5.6 $\pm$ 0.5       | 1.8 $\pm$ 0.4       | 2.0 $\pm$ 0.3              | 2.8 $\pm$ 0.4         |
| BB449960   | Transcobalamin 2*                                                                  | Tcn2              | 1.6 $\pm$ 0.4       | 1.6 $\pm$ 0.4       | 2.1 $\pm$ 0.3              | 1.5 $\pm$ 0.4         |
| AA144045   | Sema domain, immunoglobulin domain (ig), and gpi membrane anchor, (semaphorin) 7a* | Sema7a            | 2.0 $\pm$ 0.4       | 1.9 $\pm$ 0.4       | 1.5 $\pm$ 0.4              | 1.6 $\pm$ 0.4         |
| NM_019414  | Selenium binding protein 1                                                         | Selenbp1          | 1.7 $\pm$ 0.4       | 2.1 $\pm$ 0.4       | 2.6 $\pm$ 0.4              | 1.7 $\pm$ 0.4         |
| BC006809   | Phosphomannomutase 1                                                               | Pmm1              | 2.7 $\pm$ 0.4       | 1.7 $\pm$ 0.4       | 1.5 $\pm$ 0.4              | 1.5 $\pm$ 0.4         |
| AI391218   | Glutamate-ammonia ligase (glutamine synthase)*                                     | Glul              | 1.7 $\pm$ 0.4       | 2.0 $\pm$ 0.4       | 1.9 $\pm$ 0.3              | 1.7 $\pm$ 0.4         |
| BB364488   | Forkhead box o3a*                                                                  | Foxo3a            | 1.9 $\pm$ 0.4       | 2.2 $\pm$ 0.4       | 1.8 $\pm$ 0.4              | 1.5 $\pm$ 0.4         |
| NM_007647  | Ectonucleoside triphosphate diphosphohydrolase 5                                   | Entpd5            | 2.8 $\pm$ 0.4       | 1.6 $\pm$ 0.4       | 1.9 $\pm$ 0.4              | 2.0 $\pm$ 0.4         |
| AV117919   | Ectonucleoside triphosphate diphosphohydrolase 1                                   | Entpd1            | 2.6 $\pm$ 0.5       | 1.6 $\pm$ 0.5       | 1.8 $\pm$ 0.4              | 1.9 $\pm$ 0.4         |
| BI251808   | Cytochrome p450, family 1, subfamily b, polypeptide 1*                             | Cyp1b1            | 19.7 $\pm$ 0.4      | 8.5 $\pm$ 0.4       | 22.3 $\pm$ 0.4             | 21.7 $\pm$ 0.4        |
| NM_009992  | Cytochrome p450, family 1, subfamily a, polypeptide 1                              | Cyp1a1            | 57.7 $\pm$ 0.4      | 7.4 $\pm$ 0.4       | 33.8 $\pm$ 0.4             | 117.0 $\pm$ 0.4       |
| AK003232   | Carbonyl reductase 3                                                               | Cbr3              | 4.4 $\pm$ 0.4       | 1.5 $\pm$ 0.4       | 2.4 $\pm$ 0.4              | 4.0 $\pm$ 0.4         |
| BF682848   | Cdna sequence bc055107*                                                            | BC055107          | 5.1 $\pm$ 0.4       | 2.1 $\pm$ 0.4       | 7.8 $\pm$ 0.4              | 3.9 $\pm$ 0.5         |
| NM_007436  | Aldehyde dehydrogenase family 3, subfamily a1                                      | Aldh3a1           | 10.6 $\pm$ 0.4      | 2.0 $\pm$ 0.5       | 5.0 $\pm$ 0.6              | 11.8 $\pm$ 0.4        |
| BB258019   | Expressed sequence ai649393*                                                       | AI649393          | 5.4 $\pm$ 0.4       | 1.6 $\pm$ 0.4       | 1.8 $\pm$ 0.4              | 3.2 $\pm$ 0.4         |
| NM_009626  | Alcohol dehydrogenase 7 (class iv), mu or sigma polypeptide                        | Adh7              | 2.8 $\pm$ 0.4       | 2.1 $\pm$ 0.5       | 3.5 $\pm$ 0.5              | 8.8 $\pm$ 0.4         |
| BB144704   | ATP-binding cassette, sub-family A (ABC1), member 1*                               | Abca1             | 2.2 $\pm$ 0.4       | 1.8 $\pm$ 0.4       | 1.7 $\pm$ 0.4              | 1.5 $\pm$ 0.4         |
| NM_025427  | RIKEN cDNA 1190002H23 gene                                                         | 1190002<br>H23Rik | 2.5 $\pm$ 0.4       | 2.4 $\pm$ 0.4       | 3.2 $\pm$ 0.4              | 1.7 $\pm$ 0.4         |

\*Expressed Sequence Tags (ESTs)
