# Supplementary material
Source: PubMed Central journal article supplement (PMC2692799)
Supplement: 90369.2008_2.pdf [file 90369.2008_2.pdf]

**Supplemental Table 4. Number of up-regulated and down-regulated genes (in parenthesis) belonging to each functional category.**

| Type of Genes                                   | 5 h CS Vs<br>5 h Air | 8 D CS Vs<br>8 D Air | 1.5 mos CS Vs<br>1. 5 mos Air | 6 mos CS Vs<br>6 mos Air |
|-------------------------------------------------|----------------------|----------------------|-------------------------------|--------------------------|
| Transcription Factors                           | 79 (172)             | 20 (62)              | 10 (30)                       | 8 (17)                   |
| Ubiquitin-Proteasome Complex                    | 49 (52)              | 9 (29)               | 1 (1)                         | 1 (5)                    |
| Cell Survival                                   | 43 (11)              | 9 (2)                | 5 (6)                         | 5 (2)                    |
| Phase II Genes                                  | 28 (2)               | 11 (6)               | 22 (1)                        | 29 (1)                   |
| Heat Shock Proteins                             | 11 (6)               | 3 (3)                | 6 (0)                         | 1 (3)                    |
| Signal Transduction                             | 82 (138)             | 67 (74)              | 17 (67)                       | 13 (20)                  |
| Cell Cycle/Cell Adhesion/<br>Cell Proliferation | 45 (72)              | 52 (64)              | 7 (39)                        | 7 (21)                   |
| Solute Carriers & Phase III Genes               | 40 (52)              | 40 (34)              | 11 (17)                       | 7 (10)                   |
| Inflammation                                    | 58 (33)              | 39 (12)              | 10 (38)                       | 23 (15)                  |
| Lipid Metabolism                                | 30 (46)              | 37 (17)              | 10 (10)                       | 11 (5)                   |
| Cytoskeletal Reorganization                     | 36 (32)              | 37 (18)              | 5 (5)                         | 14 (2)                   |
| Oncogenes                                       | 48 (21)              | 23 (8)               | 5 (4)                         | 5 (0)                    |
| Interferon Regulated Genes                      | 3 (13)               | 3 (3)                | 1 (8)                         | 1 (3)                    |
| Humoral Immune<br>Response Genes                | 0 (14)               | 7 (3)                | 0 (17)                        | 0 (10)                   |
| Growth Factors                                  | 14 (23)              | 13 (13)              | 1 (12)                        | 2 (9)                    |
| Extracellular Matrix                            | 28 (13)              | 22 (19)              | 4 (23)                        | 9 (16)                   |
| Phase I Genes                                   | 11 (15)              | 28 (11)              | 18 (13)                       | 13 (11)                  |
| Apoptosis                                       | 13 (26)              | 6 (5)                | 6 (8)                         | 7 (3)                    |
| Other Genes                                     | 563 (1040)           | 302 (355)            | 111 (155)                     | 85 (95)                  |
