# Supplementary material
Source: PubMed Central journal article supplement (PMC2692799)
Supplement: 90369.2008_3.pdf [file 90369.2008_3.pdf]

**Supplemental Table 6. Some of the down-regulated genes in the lungs from CS exposed A/J mice whose deletion or overexpression have been shown to contribute to the pathogenesis of emphysema in various mice models.**

| <b>Genbank ID</b> | <b>Gene Title</b>                                        | <b>5 h<br/>FC±SEM</b> | <b>8 Days<br/>FC±SEM</b> | <b>1.5 mos<br/>FC± SEM</b> | <b>6 mos<br/>FC ± SEM</b> |
|-------------------|----------------------------------------------------------|-----------------------|--------------------------|----------------------------|---------------------------|
| AF357006          | Lysyl oxidase-like 1                                     | N.C.                  | N.C.                     | -3.8 ± 0.6                 | -1.7 ± 0.4                |
| BB554226          | Latent transforming growth factor beta binding protein 4 | N.C.                  | N.C.                     | N.C.                       | -1.5 ± 0.4                |
| NM_007993         | Fibrillin 1                                              | N.C.                  | N.C.                     | -1.8 ± 0.4                 | N.C.                      |
| BB229377          | Elastin                                                  | N.C.                  | -2.0 ± 0.4               | N.C.                       | N.C.                      |
| NM_021359         | Integrin beta 6                                          | N.C.                  | N.C.                     | -2.3 ± 0.4                 | -1.8 ± 0.4                |
| AI596237          | Lysosomal acid lipase 1                                  | -1.6 ± 0.4            | N.C.                     | N.C.                       | N.C.                      |
| BM233698          | Colony stimulating factor 1 (macrophage)                 | -1.9 ± 0.4            | N.C.                     | N.C.                       | N.C.                      |
| BB371842          | Platelet derived growth factor, alpha                    | -1.8 ± 0.4            | N.C.                     | N.C.                       | N.C.                      |
| AF185285          | Toll-like Receptor 4                                     | -2.2 ± 0.4            | N.C.                     | N.C.                       | N.C.                      |
| BC011437          | interleukin 1 beta                                       | N.C.                  | -1.9 ± 0.4               | N.C.                       | N.C.                      |
